# Supplementary material for: An Ancient Mediterranean Melting Pot: Investigating the Uniparental Genetic Structure and Population History of Sicily and Southern Italy
Source: PLoS One. 2014 Apr 30;9(4):e96074. doi: 10.1371/journal.pone.0096074 (PMC4005757; doi:10.1371/journal.pone.0096074)
Supplement: Table S4 — Analyses of the molecular variance (AMOVA) for Y-chromosome and mtDNA based on both haplogroup frequencies (SNPs) and haplotype data (STRs or sequences). (XLSX) [file pone.0096074.s007.xlsx]

## Sheet: Table S4 - AMOVA
Table S4. Analyses of the molecular variance (AMOVA) for Y-chromosome and mtDNA based on both haplogroup frequencies (SNPs) and haplotype data (STRs or sequences)
			Proportion of variation (%)
Y-chromosome Grouping	N° of Groups	N° of Pop	Among Groups		Among population Within Group		Within Population
			Y-SNPs	Y-STRs	Y-SNPs	Y-STRs	Y-SNPs	Y-STRs
ALL	1	8			0.16	0.36	99.84	99.64
ITAS/SIC	2	8	-0.13	-0.42	0.23	0.58	99.9	99.85
ITAS/ESIC/WSIC	3	8	-0.09	0.1	0.23	0.28	99.86	99.62
ESIC/WSIC	2	5	0.01	0.55	0.2	0.54	99.79	98.91
			Proportion of variation (%)
Mitochondrial DNA Grouping	N° of Groups	N° of Pop	Among Groups		Among population Within Group		Within Population
			Mt-SNPs	Mt-SEQs	Mt-SNPs	Mt-SEQs	Mt-SNPs	Mt-SEQs
ALL	1	8			0.41	1.02**	99.59	98.98**
ITAS/SIC	2	8	-0.4	-0.51	0.62	1.29***	99.78	99.22**
ITAS/ESIC/WSIC	3	8	-0.11	-0.58	0.49	1.45***	99.62	99.13**
ESIC/WSIC	2	5	0.11	-0.46	0.98*	1.71**	98.81*	98.75**
Values are in percentage and corrected upon Bonferroni test
ITAS: CS, MT, LE
SIC: TP, AG, EN, RGSR, CT
ESIC: EN, RGSR, CT
WSIC: AG, TP
*** P-value < 0,001
** P-value < 0,01
* P-value < 0,05
