# Supplementary material for: An Ancient Mediterranean Melting Pot: Investigating the Uniparental Genetic Structure and Population History of Sicily and Southern Italy
Source: PLoS One. 2014 Apr 30;9(4):e96074. doi: 10.1371/journal.pone.0096074 (PMC4005757; doi:10.1371/journal.pone.0096074)
Supplement: Table S5 — Diversity parameters for uniparental genomes based on haplogroup frequencies (SNPs) and haplotype data (STRs or sequences). (XLSX) [file pone.0096074.s008.xlsx]

## Sheet: Table S5 - Diversity indices
Table S5. Diversity parameters for uniparental genomes based on haplogroup frequencies (SNPs) and haplotype data (STRs or sequences).
Y-Chromosome
		STRs									SNPs
Population	N	STR div (h) ± sd			MNPD (π) ± sd			Nucleotyde div (πN) ± sd			Haplogroup div (h) ± sd
ALL	326	0.9997	+/-	0.0003	9.82845	+/-	4.51066	0.614278	+/-	0.311845	0.9438	+/-	0.0041
ITAS	110	0.9997	+/-	0.0013	9.14645	+/-	4.23944	0.609764	+/-	0.312986	0.9441	+/-	0.0077
SIC	216	0.9994	+/-	0.0005	9.89414	+/-	4.54466	0.618384	+/-	0.314287	0.9441	+/-	0.0052
WSIC	79	0.9984	+/-	0.0025	10.0951	+/-	4.66197	0.630944	+/-	0.322889	0.94	+/-	0.0099
ESIC	137	0.9992	+/-	0.001	9.2676	+/-	4.28524	0.61784	+/-	0.316261	0.9459	+/-	0.0068
TP	34	0.9929	+/-	0.0099	9.98396	+/-	4.68041	0.623997	+/-	0.325255	0.9234	+/-	0.0194
AG	45	0.999	+/-	0.005	10.1434	+/-	4.72098	0.633965	+/-	0.327592	0.9535	+/-	0.0142
EN	40	0.9987	+/-	0.006	9.72692	+/-	4.5504	0.607933	+/-	0.315933	0.9487	+/-	0.0182
RGSR	45	0.998	+/-	0.0052	9.39192	+/-	4.39365	0.626128	+/-	0.325204	0.9475	+/-	0.0157
CT	52	0.9977	+/-	0.0043	9.22323	+/-	4.30915	0.614882	+/-	0.318759	0.9367	+/-	0.0162
CS	45	1	+/-	0.0047	9.65859	+/-	4.50981	0.603662	+/-	0.312939	0.9384	+/-	0.0132
MT	25	1	+/-	0.0113	10.0133	+/-	4.73696	0.625833	+/-	0.329925	0.9333	+/-	0.0354
LE	40	0.9974	+/-	0.0063	9.09487	+/-	4.2744	0.606325	+/-	0.316555	0.9526	+/-	0.0151
mtDNA
		SEQs									SNPs
Population	N	SEQ div (h) ± sd			MNPD (π) ± sd			Nucleotyde div (πN) ± sd			Haplogroup div (h) ± sd
ALL	313	0.9899	+/-	0.0026	6.87802	+/-	3.24534	0.01022	+/-	0.005334	0.9452	+/-	0.0051
ITAS	115	0.9969	+/-	0.0017	7.31435	+/-	3.4484	0.010868	+/-	0.005674	0.9504	+/-	0.0079
SIC	198	0.9828	+/-	0.0049	6.63435	+/-	3.14545	0.009858	+/-	0.005172	0.9439	+/-	0.0068
WSIC	82	0.9759	+/-	0.0098	6.33587	+/-	3.03493	0.009414	+/-	0.004997	0.9359	+/-	0.0148
ESIC	116	0.9862	+/-	0.005	6.83105	+/-	3.23967	0.01015	+/-	0.00533	0.9454	+/-	0.0077
TP	40	0.9795	+/-	0.0109	7.23678	+/-	3.4623	0.010753	+/-	0.005715	0.9024	+/-	0.0345
AG	42	0.964	+/-	0.0191	5.3917	+/-	2.65145	0.008011	+/-	0.004376	0.9024	+/-	0.0345
EN	40	0.9897	+/-	0.0076	6.8792	+/-	3.30585	0.010222	+/-	0.005457	0.9436	+/-	0.017
RGSR	39	0.9798	+/-	0.0114	6.28534	+/-	3.04754	0.009339	+/-	0.005031	0.9163	+/-	0.022
CT	37	0.976	+/-	0.0182	7.09054	+/-	3.40425	0.010536	+/-	0.005621	0.964	+/-	0.013
CS	40	0.9949	+/-	0.0069	7.01056	+/-	3.36334	0.010417	+/-	0.005552	0.9654	+/-	0.0119
MT	36	0.9984	+/-	0.007	7.38113	+/-	3.53386	0.010967	+/-	0.005836	0.9587	+/-	0.016
LE	39	0.9946	+/-	0.0071	7.41177	+/-	3.54079	0.011013	+/-	0.005845	0.9325	+/-	0.0216
