# Supplementary material for: An Ancient Mediterranean Melting Pot: Investigating the Uniparental Genetic Structure and Population History of Sicily and Southern Italy
Source: PLoS One. 2014 Apr 30;9(4):e96074. doi: 10.1371/journal.pone.0096074 (PMC4005757; doi:10.1371/journal.pone.0096074)
Supplement: Table S6 — Fisher exact test for Y-chromosome and mtDNA HG frequencies among the Mediterraean population groups. (XLSX) [file pone.0096074.s009.xlsx]

## Sheet: Table S6 - FISHER
Table S6. Fisher exact test for Y-chromosome and mtDNA HG frequencies among the Mediterraean population groups
Y-chromosome	PopCod	Freq	C-M130	E-M96	E-M35	E-M78	E-M81	E-M123	F-M89	G-M201	I-M170	I-M26	I-M223	J-M304	J-M172	J-M410	J-M12	K-M9	R-M207	R-SRY10831.2	R-M343	R-M269	T-M70
	SSI	N	0	2	3	47	5	7	0	42	11	2	6	16	2	52	11	2	0	17	3	90	8
		%	0	0.613497	0.920245	14.4172	1.53374	2.14724	0	12.8834	3.37423	0.613497	1.84049	4.90798	0.613497	15.9509	3.37423	0.613497	0	5.21472	0.920245	27.6074	2.45399
		Pvalue								0.000167608	0.000844338			0.0467561				0.0143246
	NCI	N	0	0	1	28	2	7	4	25	18	1	3	9	0	30	4	4	0	8	1	122	2
		%	0	0	0.371747	10.4089	0.743494	2.60223	1.48699	9.29368	6.69145	0.371747	1.11524	3.34572	0	11.1524	1.48699	1.48699	0	2.97398	0.371747	45.3532	0.743494
		Pvalue							0.0079535					0.00204873								7.35208e-10
	IBE	N	0	0	0	2	3	0	0	2	3	8	0	2	0	6	2	2	0	2	0	75	4
		%	0	0	0	1.8018	2.7027	0	0	1.8018	2.7027	7.20721	0	1.8018	0	5.40541	1.8018	1.8018	0	1.8018	0	67.5676	3.6036
		Pvalue				0.030446						2.93746e-07		0.044174								5.02e-18
	GER	N	1	0	1	23	1	0	0	9	66	0	13	2	0	15	3	6	0	45	0	161	3
		%	0.286533	0	0.286533	6.59026	0.286533	0	0	2.5788	18.9112	0	3.72493	0.573066	0	4.29799	0.859599	1.7192	0	12.894	0	46.1318	0.859599
		Pvalue					0.00103683	0.00730533		0.00692224	6.64646e-10		0.00426913	1.89553e-12		5.6274e-08				1.04977e-06		9.94349e-15
	BALK	N	0	0	0	30	0	2	0	13	47	0	4	6	1	14	8	2	0	26	0	30	2
		%	0	0	0	16.2162	0	1.08108	0	7.02703	25.4054	0	2.16216	3.24324	0.540541	7.56757	4.32432	1.08108	0	14.0541	0	16.2162	1.08108
		Pvalue					0.0441275				2.39201e-11			0.0396725						0.000411872		0.00285871
	LEV	N	1	9	2	53	7	25	0	38	26	0	0	120	0	132	17	49	12	15	4	44	23
		%	0.17331	1.55979	0.34662	9.18544	1.21317	4.33276	0	6.58579	4.50607	0	0	20.7972	0	22.8769	2.94627	8.4922	2.07972	2.59965	0.693241	7.62565	3.98614
		Pvalue					0.00889808	0.000843527			9.3153e-05		0.00259657	6.09169e-26		8.40211e-14		1.28102e-12	9.99017e-05	0.000425431		5.69268e-43	0.0196481
	NAFR	N	0	8	0	6	46	0	0	0	0	0	0	23	0	5	0	1	1	1	0	11	0
		%	0	7.84314	0	5.88235	45.098	0	0	0	0	0	0	22.549	0	4.90196	0	0.980392	0.980392	0.980392	0	10.7843	0
		Pvalue		4.73675e-05			9.80051e-48			0.0330787	0.0021471			0.000583641								0.00069629
mtDNA	PopCod	Freq	L	M	N	N1	I	W	X	R*	R0	HV	H	V	T	J	U	K
	SSI	N	2	6	2	9	8	3	14	2	2	15	119	5	41	31	41	13
		%	0.638978	1.91693	0.638978	2.8754	2.55591	0.958466	4.47284	0.638978	0.638978	4.79233	38.0192	1.59744	13.099	9.90415	13.099	4.15335
		Pvalue	2.19039e-06
	NCI	N	0	2	2	5	3	2	3	0	3	9	105	3	24	19	28	21
		%	0	0.873362	0.873362	2.18341	1.31004	0.873362	1.31004	0	1.31004	3.93013	45.8515	1.31004	10.4803	8.29694	12.2271	9.17031
		Pvalue	3.27668e-06										0.0481434
	IBE	N	1	0	0	0	1	0	1	0	1	3	66	1	8	8	19	7
		%	0.862069	0	0	0	0.862069	0	0.862069	0	0.862069	2.58621	56.8966	0.862069	6.89655	6.89655	16.3793	6.03448
		Pvalue											0.000108152
	BALK	N	1	6	0	4	14	15	15	2	9	19	251	11	40	53	100	26
		%	0.176678	1.06007	0	0.706714	2.4735	2.65018	2.65018	0.353357	1.59011	3.35689	44.3463	1.94346	7.06714	9.36396	17.6678	4.59364
		Pvalue	5.10278e-16					0.0284356					0.000300028
	LEV	N	18	13	8	15	12	6	10	6	20	24	182	8	56	39	78	54
		%	3.27869	2.36794	1.45719	2.73224	2.18579	1.0929	1.82149	1.0929	3.64299	4.37158	33.1512	1.45719	10.2004	7.10383	14.2077	9.83607
		Pvalue	0.00894035		0.0333114													0.0009287
	NAFR	N	122	26	0	5	3	3	9	0	21	37	115	9	38	34	68	18
		%	24.0157	5.11811	0	0.984252	0.590551	0.590551	1.77165	0	4.13386	7.28346	22.6378	1.77165	7.48031	6.69291	13.3858	3.54331
		Pvalue	9.99581e-61	0.000225831									2.89677e-13
Abbreviations: SSI, Sicily and South-Italy; NCI, North-Central Italy; IBE, Iberian Peninsula; GER, Germany; BALK, Balkan Peninsula; LEV, Levant; NAFR, North-Africa
All non-significant p-values after Bonferroni correction have been removed
